# Supplementary material for: Mathematical Modelling of Molecular Pathways Enabling Tumour Cell Invasion and Migration
Source: PLoS Comput Biol. 2015 Nov 3;11(11):e1004571. doi: 10.1371/journal.pcbi.1004571 (PMC4631357; doi:10.1371/journal.pcbi.1004571)
Supplement: S2 Table — (XLSX) [file pcbi.1004571.s012.xlsx]

## Sheet: Sheet1
	In the reduced network, each module corresponds to a pathway. We analysed the results of alterations at
	the level of pathways rather than individual genes and mutated each node of the modular network as we did for the detailed network.
	Black circles represent possible phenotypes (not showing the possible values of inputs and internal variables)
	A more thorough description on how these circles were obtained and how to read this table is given in S4_Table_Mutants for the wild type condition
	The results are summarised in the table below
	Mutant	metastasis	migration	invasion	EMT	apoptosis	cell cycle arrest	HS
	Notch pathway OE						1
		1	1	1	1		1
	Notch pathway KO							1
					1		1
						1	1
		1	1	1	1		1
	p53 pathway OE					1	1
	p53 pathway KO							1
					1		1
						1	1
		1	1	1	1		1
	TGFb pathway OE							1
		1	1	1	1		1
							1
	TGFb pathway KO							1
					1		1
						1	1
	ERK pathway OE							1
					1		1
							1
		1	1	1	1		1
	ERK pathway KO							1
					1		1
						1	1
				1	1		1
	EMTreg OE				1		1
		1	1	1	1		1
	EMTreg KO							1
						1	1
	Wnt pathway OE			1	1
				1		1	1
				1		1	1
	Wnt pathway KO							1
					1		1
						1	1
		1	1	1	1		1
	AKT1 OE							1
					1
				1	1
	AKT1 KO							1
					1		1
						1	1
		1	1	1	1		1
	AKT2 OE				1		1
		1	1	1	1		1
	AKT2 KO							1
					1		1
						1	1
				1	1		1
	p63_73 pathway OE					1	1
					1		1
				1	1		1
	p63_p73 pathway KO							1
					1		1
						1	1
		1	1	1	1		1
	miRNA OE					1	1
								1
					1		1
	miRNA KO					1	1
		1	1	1	1		1
	Notch pathway OE p53 KO	1	1	1	1		1
	Notch pathway OE, p53 pathway KO, TGFb pathway KO				1		1
	Table S2. Stable states that can be reached by setting the activity of a single module or pathway to 1 (GoF: gain of function) or 0 (LoF: loss of function).
